# Supplementary material for: Sc^3＋掺杂的尖晶石型LiMn2O4正极材料制备及性质
Source: Royal Society of Chemistry journal article supplement (doi:10.1039/c1dt10377f), 2005-01-01
Supplement: c1dt10377f.pdf [file c1dt10377f.pdf]

## Tri- and Tetracoordinate Copper(I) Complexes bearing Bidentate Soft/Hard SN and SeN Ligands based on 2-Aminopyridine

Özgür Öztopcu,<sup>[a]</sup> Kurt Mereiter,<sup>[b]</sup> Michael Puchberger,<sup>[c]</sup> Karl A. Kirchner<sup>[a]</sup> \*

### Supporting Information

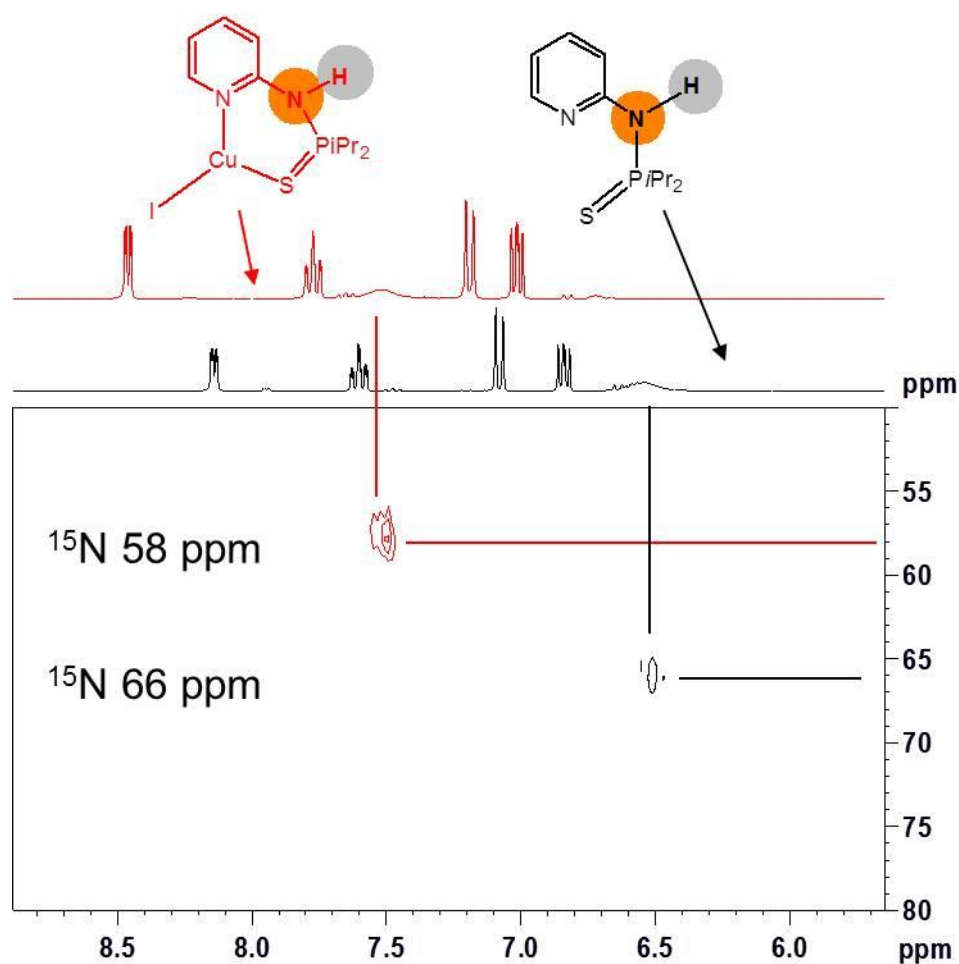

**Figure S1.** 300 MHz <sup>1</sup>H-<sup>15</sup>N HSQC spectra of SN-*i*Pr (**2b**) and [Cu(SN-*i*Pr)] (**5b**) in acetone-*d*<sub>6</sub> at 25°C.

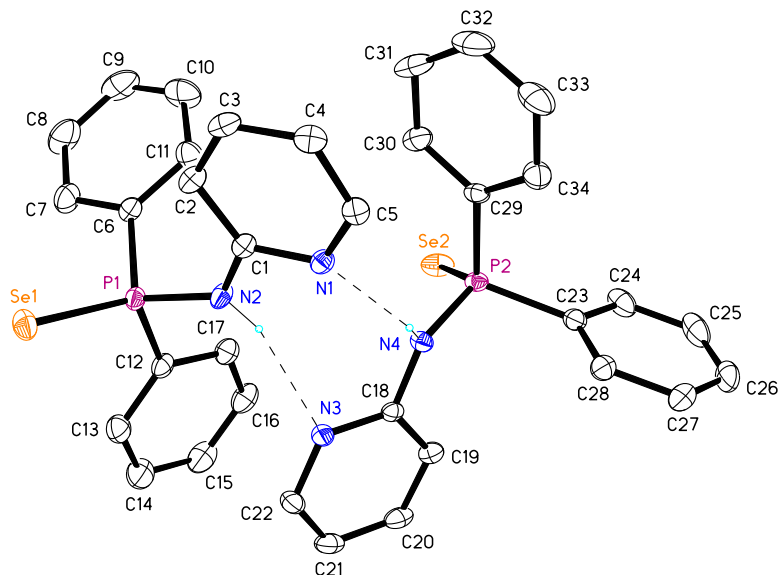

**Figure S2.** ORTEP diagram of **2a** showing the two independent molecules of the structure with 50% displacement ellipsoids. The compound is isostructural with the S-analogue **1a**. Carbon-bonded H atoms omitted for clarity. Selected distances and angles ( $\text{\AA}$ ,  $^\circ$ ): P1–Se1 2.1004(5), P2–Se2 2.1030(5), P1–N2 1.6692(15), P2–N4 1.6692(14), N2–P1–Se1 116.19(6), N4–P2–Se2 115.53(5), N1–C1–N2–P1 176.0(1), N3–C18–N4–P2 -151.0(12), C1–N2–P1–Se1 -58.7(2), C18–N4–P2–Se2 45.8(2), N2 $\cdots$ N3 2.940(2), N4 $\cdots$ N1 2.926(2).

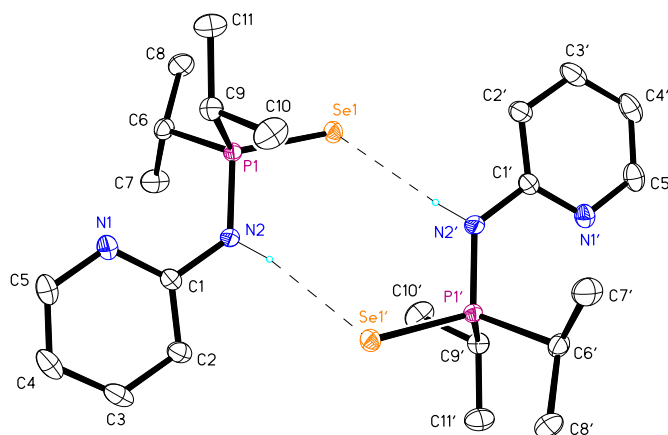

**Figure S3.** ORTEP diagram of **2b** showing two inversion-related and N–H $\cdots$ Se hydrogen bonded molecules of the structure with 50% displacement ellipsoids. Atoms with primed atom labels are symmetry equivalents of the unprimed atoms. The compound is not isostructural with the S-analogue **1b**. Carbon-bonded H atoms omitted for clarity. Selected distances and angles ( $\text{\AA}$ ,  $^\circ$ ): P1–Se1 2.1136(3), P1–N2 1.6812(9), N2–P1–Se1 105.50(3), N1–C1–N2–P1 -1.61(14), C1–N2–P1–Se1 -177.33(8), N2 $\cdots$ Se1' 3.590(1).

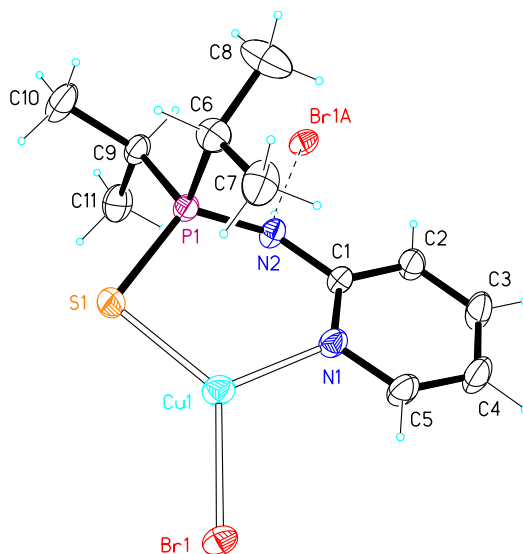

**Figure S4.** Molecular structure of **3b** showing 30% displacement ellipsoids. The compound is isostructural with **5b** and **6b**. Selected distances and angles (Å, °): Cu1–N1 2.026(2), Cu1–S1 2.2046(7), Cu1–Br1 2.3267(4), P1–S1 1.9892(8), P1–N2 1.674(2), N2–C1 1.390(3), N1–Cu1–S1 115.24(5), N1–Cu1–Br1 113.86(5), S1–Cu1–Br1 130.27(2), P1–S1–Cu1 93.62(3), N2–P1–S1 117.50(7), C1–N2–P1 131.8(2), N1–C1–N2 118.9(2), Cu1–N1–C1 123.3(2); hydrogen bond N2⋯Br1a 3.447(2).

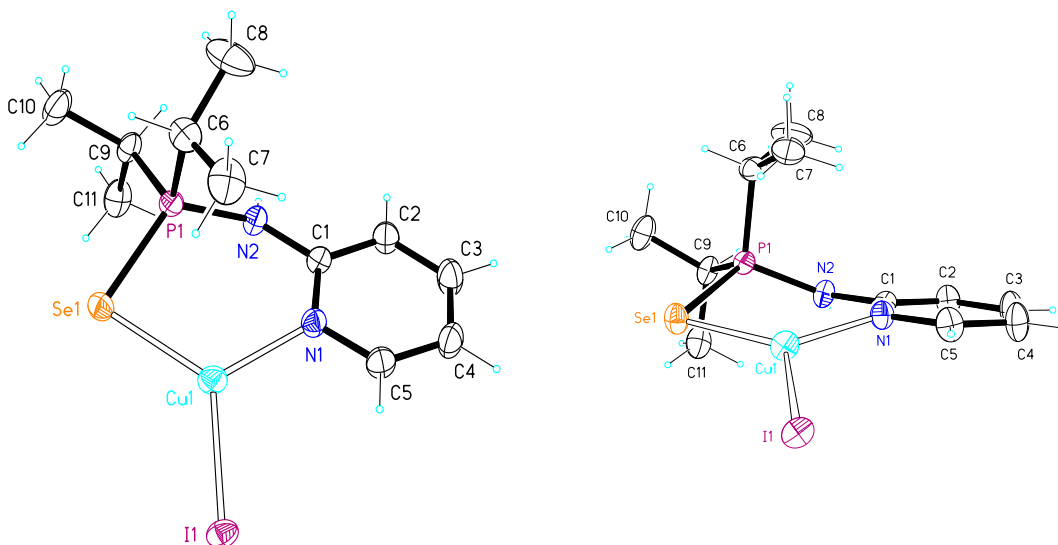

**Figure S5.** Molecular structure of **6b** showing 30% displacement ellipsoids in top and side view. The compound is isostructural with **3b** and **5b**. Selected distances and angles (Å, °): Cu1–N1 2.017(4), Cu1–Se1 2.3226(8), Cu1–I1 2.4946(6), P1–Se1 2.145(1), P1–N2 1.680(4), N2–C1 1.387(6), N1–Cu1–Se1 117.87(14), N1–Cu1–I1 115.52(11), Se1–Cu1–I1 126.97(3), P1–Se1–Cu1 88.76(4), N2–P1–Se1 117.87(14), C1–N2–P1 132.3(3), N1–C1–N2 118.8(4), Cu1–N1–C1 124.2(3); hydrogen bond N2⋯I1, 3.721(3) Å, not shown.

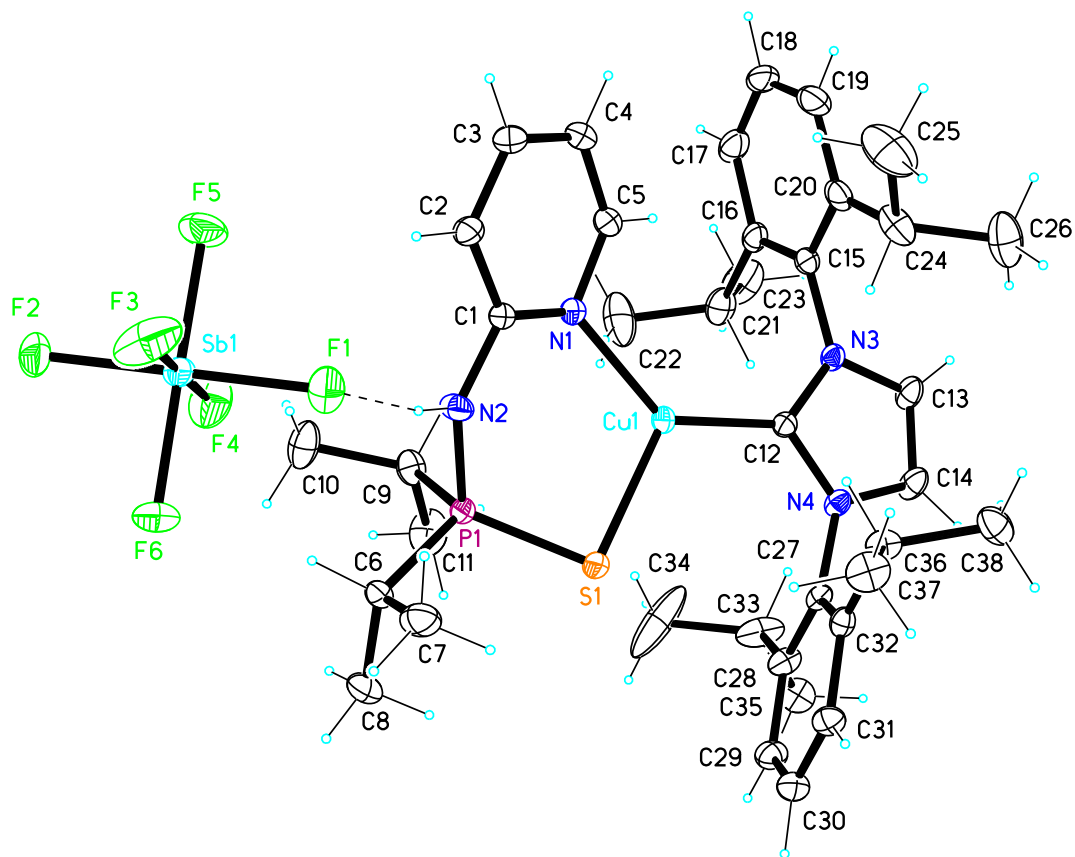

**Figure S6.** Molecular structure of **7b** showing 50% displacement ellipsoids. Selected distances and angles ( $\text{\AA}$ ,  $^\circ$ ): Cu1–C12 1.935(2), Cu1–N1 2.044(2), Cu1–S1 2.3057(5), P1–S1 1.9746(6), P1–N2 1.672(2), C12–Cu1–N1 135.19(7), C12–Cu1–S1 117.74(5), N1–Cu1–S1 106.91(4), P1–S1–Cu1 94.47(2); hydrogen bond N2 $\cdots$ F1 3.023(2).
